# Supplementary material
Source: PubMed Central journal article supplement (PMC9088347)

- AY.43.1
- AY.43.2
- AY.43 - other countries
- AY.43 – Brazilian clade
- Background sequences

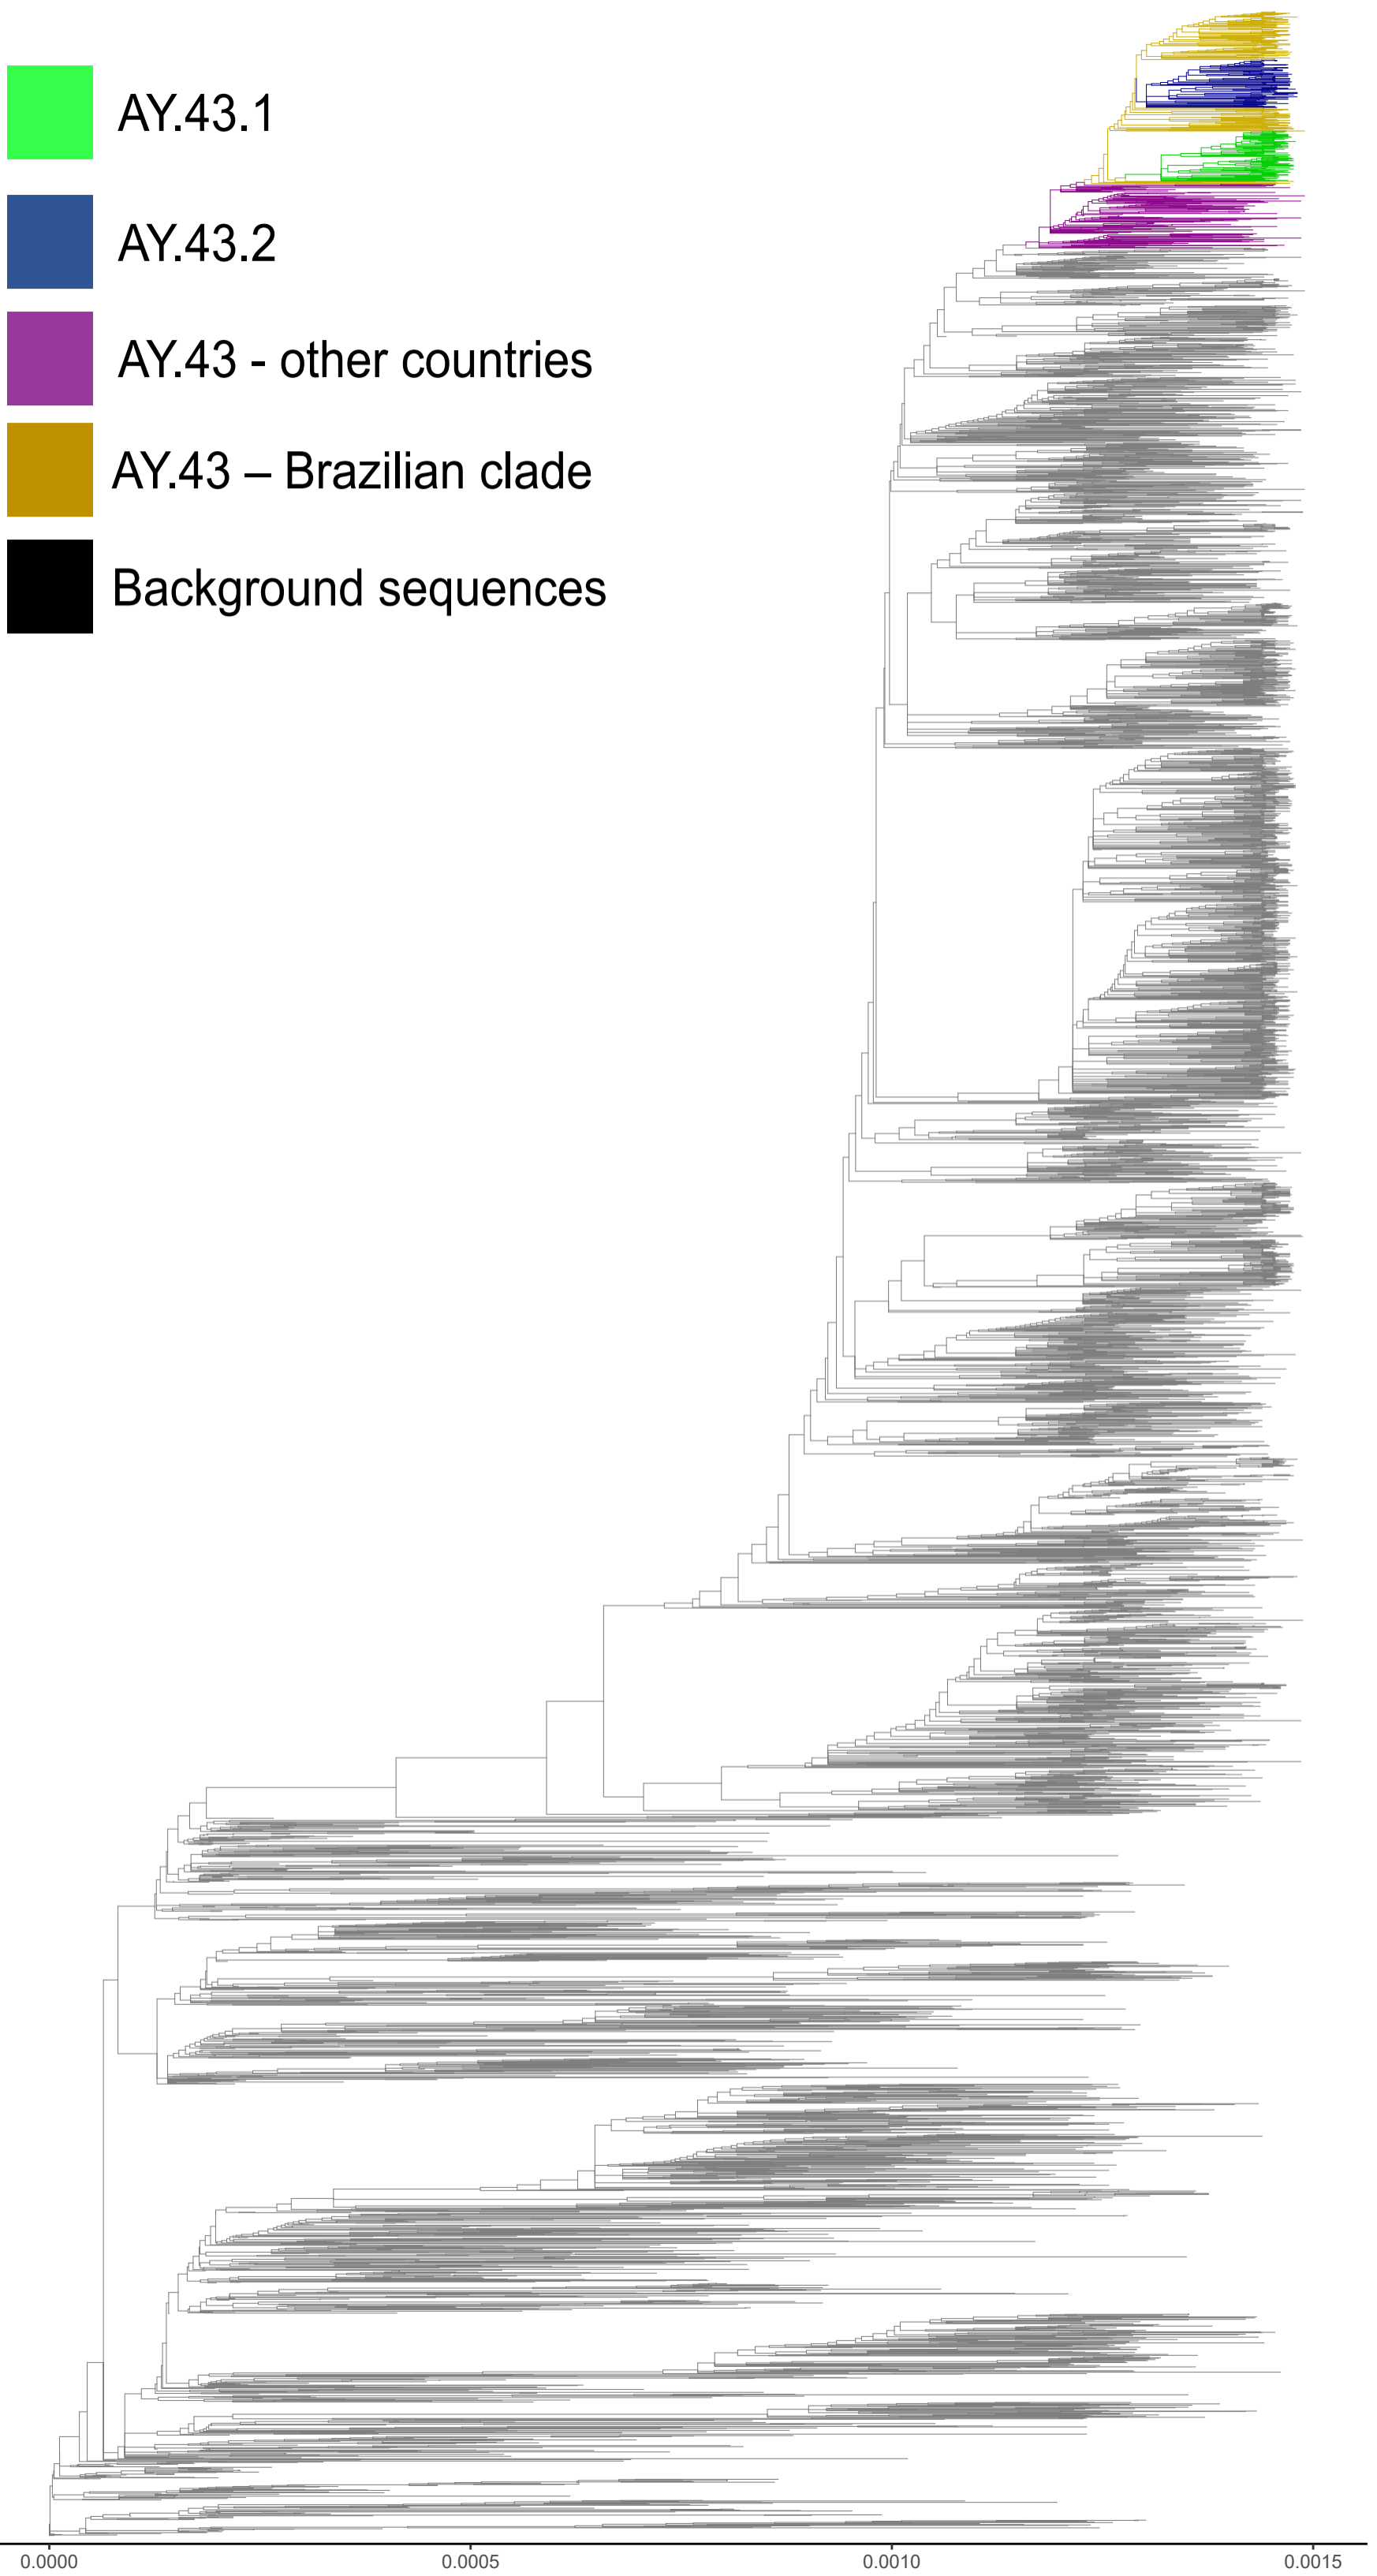

Supplement: JMV-94-3394-s002.pdf [file JMV-94-3394-s002.pdf]
